# Supplementary material for: Computational Investigation of Voltage-Gated Sodium Channel β3 Subunit Dynamics
Source: PubMed Central journal article supplement (PMC7103644; doi:10.3389/fmolb.2020.00040), 2020-03-18
Supplement: Presentation_1.pdf [file Presentation_1.pdf]

## **Supporting Information**

### **Computational Investigation of Voltage-gated Sodium Channel**

#### **$\beta$ 3 Subunit Dynamics**

William G. Glass, Anna L. Duncan, and Philip C. Biggin\*

Structural Bioinformatics and Computational Biochemistry, Department of Biochemistry, University of Oxford, South Parks Road, Oxford, OX1 3QU, United Kingdom.

\*To whom correspondence should be addressed.

Email: [philip.biggin@bioch.ox.ac.uk](mailto:philip.biggin@bioch.ox.ac.uk)

Tel. +44 1865 613305

Fax. +44 1865 613238



A

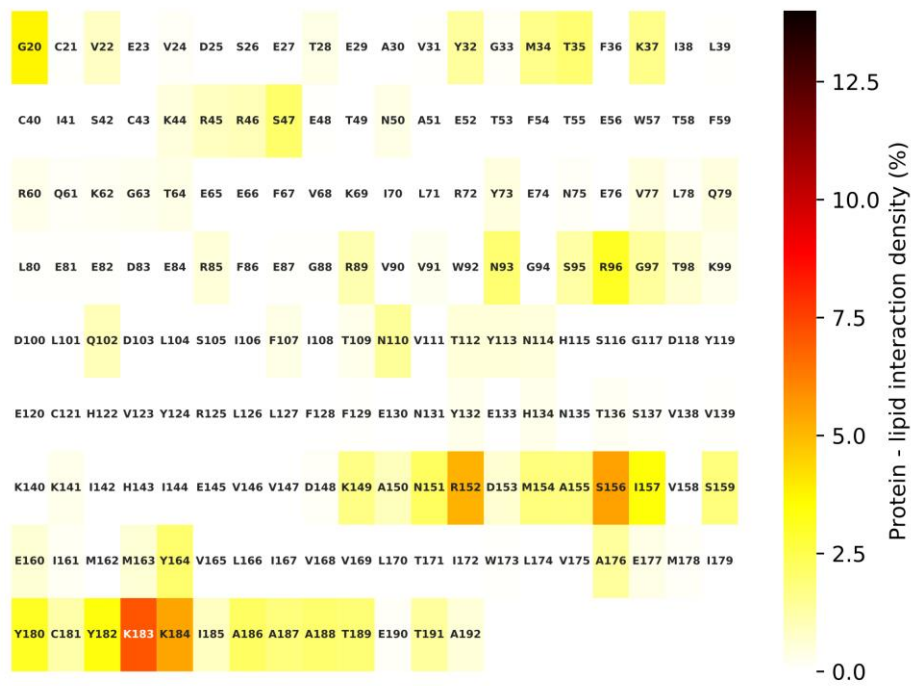

B

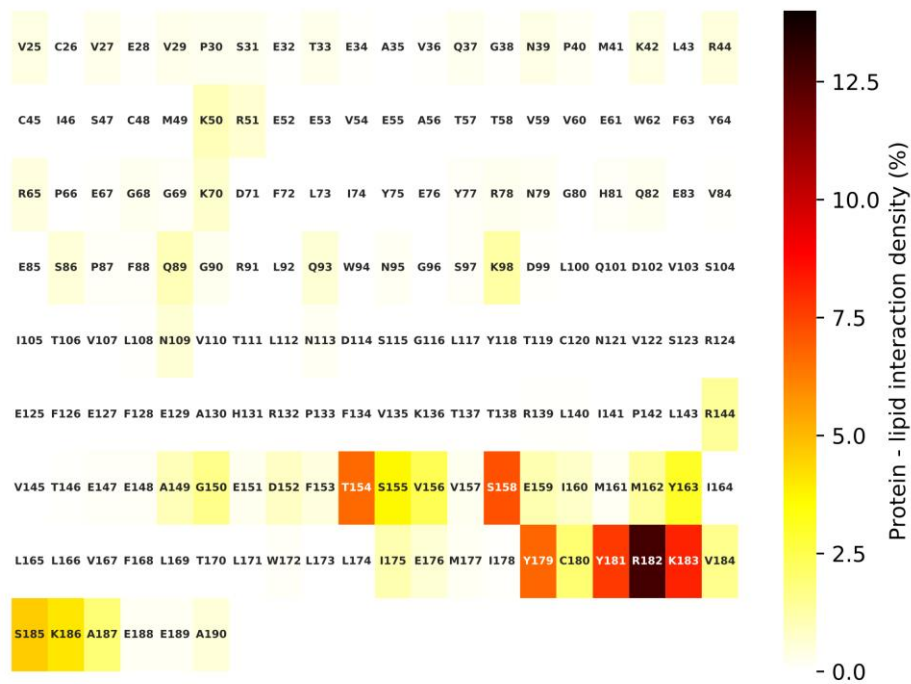

**Figure S2.**  $\beta 1$  &  $\beta 3$  atomistic monomer average contact maps with the phosphate headgroup of a POPC membrane. (A)  $\beta 1$ . (B)  $\beta 3$ .

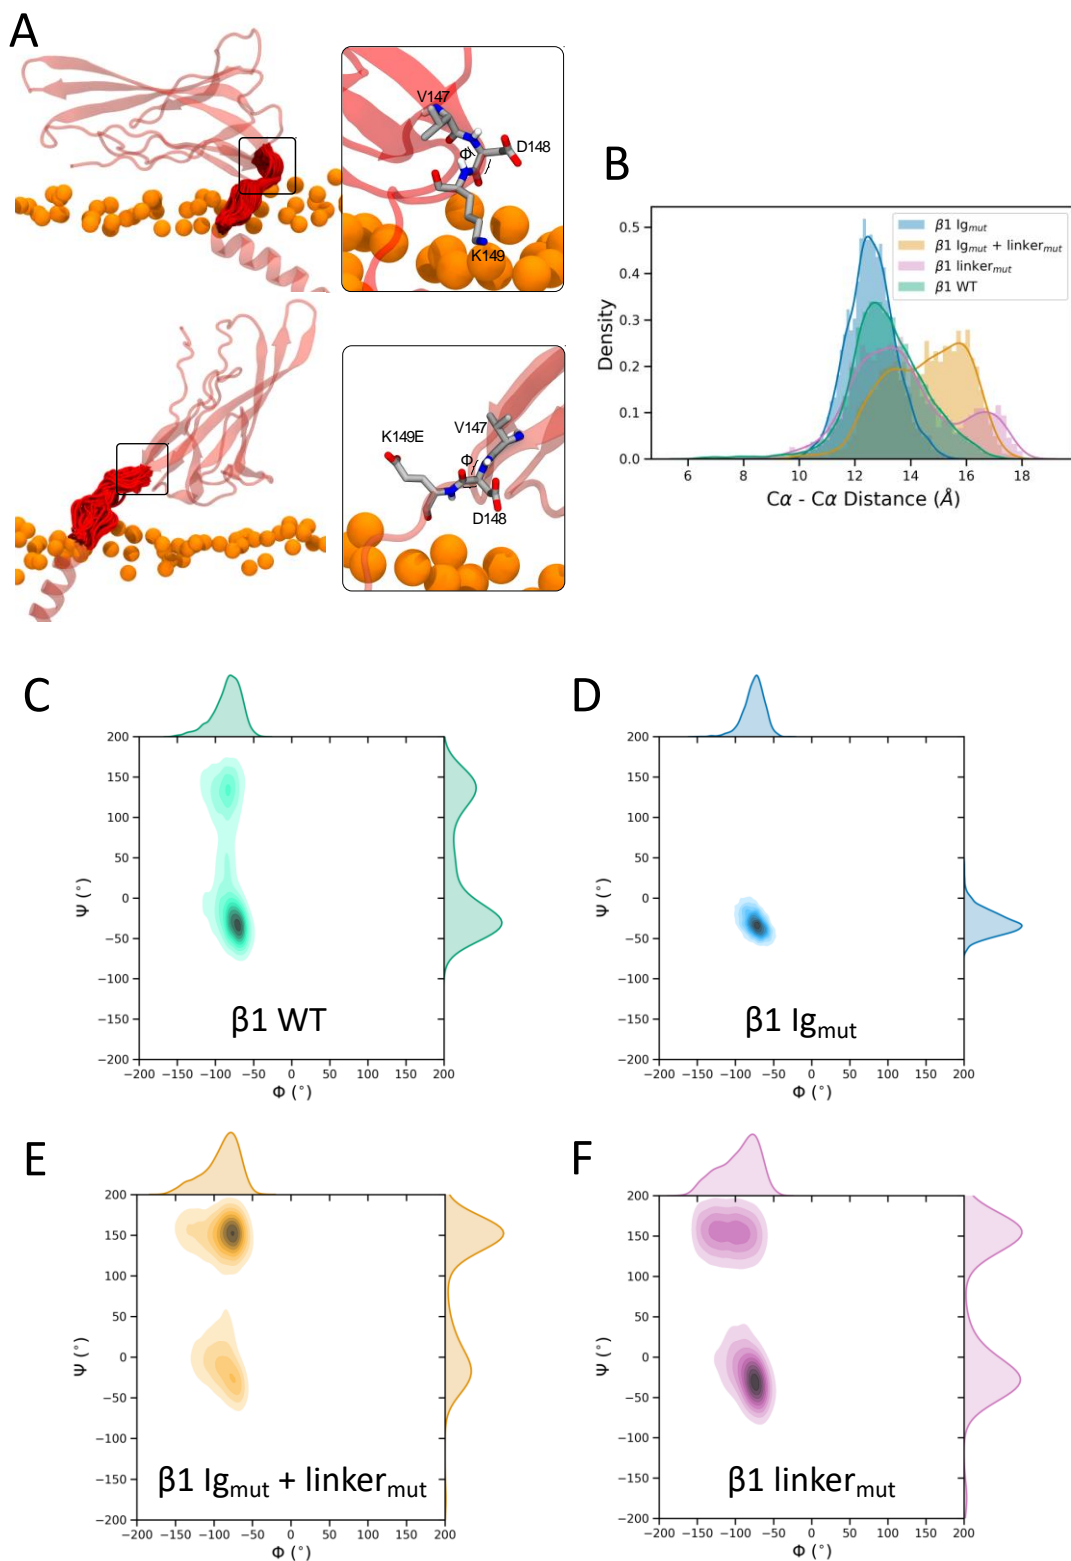

**Figure S3.** (A) Typical conformation of both WT  $\beta 1$  and the  $\beta 1$  Ig<sub>mut</sub>, exhibiting linker bending around D148 (top) and a typical conformation of the  $\beta 1$  Ig<sub>mut</sub> + linker<sub>mut</sub> with a more linear and disordered linker (bottom). Snapshots of the linker are shown in deep red with the residues surrounding D148 shown in the inset with  $\phi$  and  $\phi$  angles indicated. (B) Histograms of the C $\alpha$  – C $\alpha$  distance in the linker (defined between V146 and R/E152), where mutation of the linker causes an average increase in linker length. (C - F) Ramachandran plots of the D148 backbone in  $\beta 1$  WT,  $\beta 1$  Ig<sub>mut</sub>,  $\beta 1$  Ig<sub>mut</sub> + linker<sub>mut</sub>, and  $\beta 1$  linker<sub>mut</sub>. Upon mutation of the Ig domain and linker there is an increase in sampling of  $\phi$  angles around 150°, this trend is followed to a lesser extent with only the linker mutated (i.e. K149E and K152E).

A

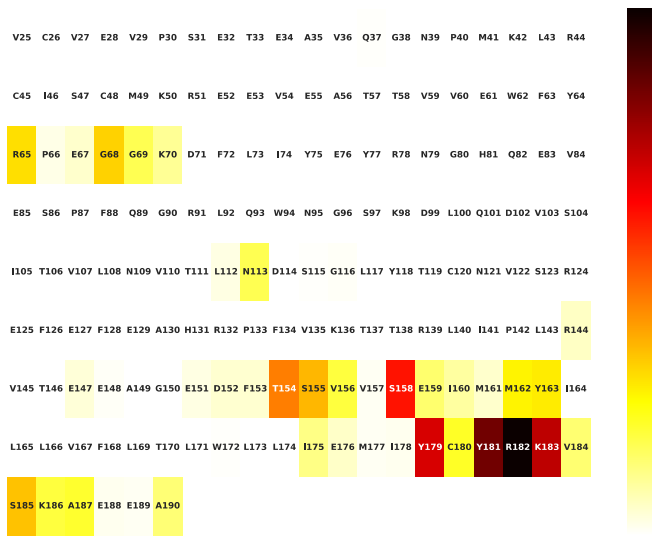

B

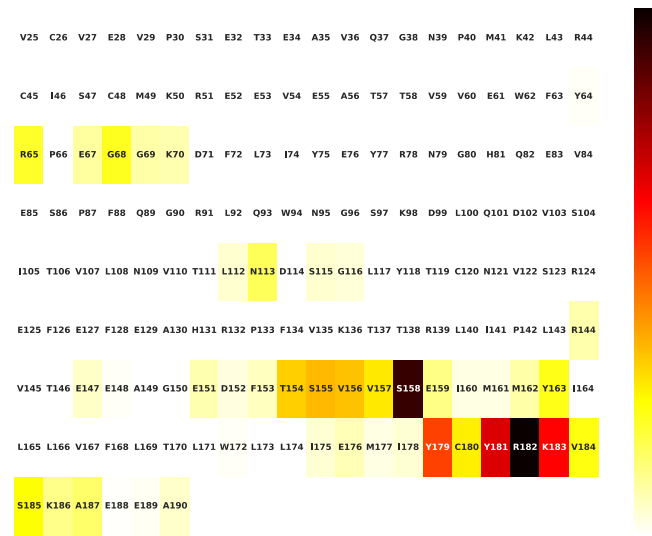

C

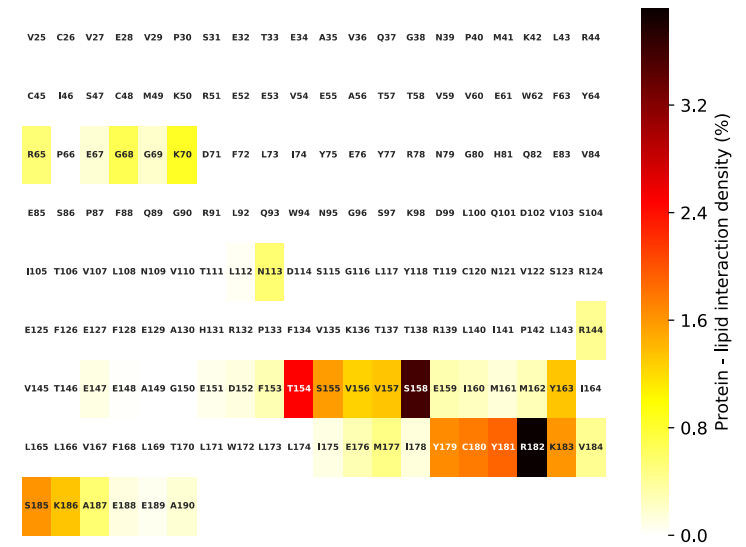

**Figure S4.**  $\beta_3$  trimer – POPC contact maps. (A) – (C) represent averages across each  $\beta_3$  chain in the trimeric construct.

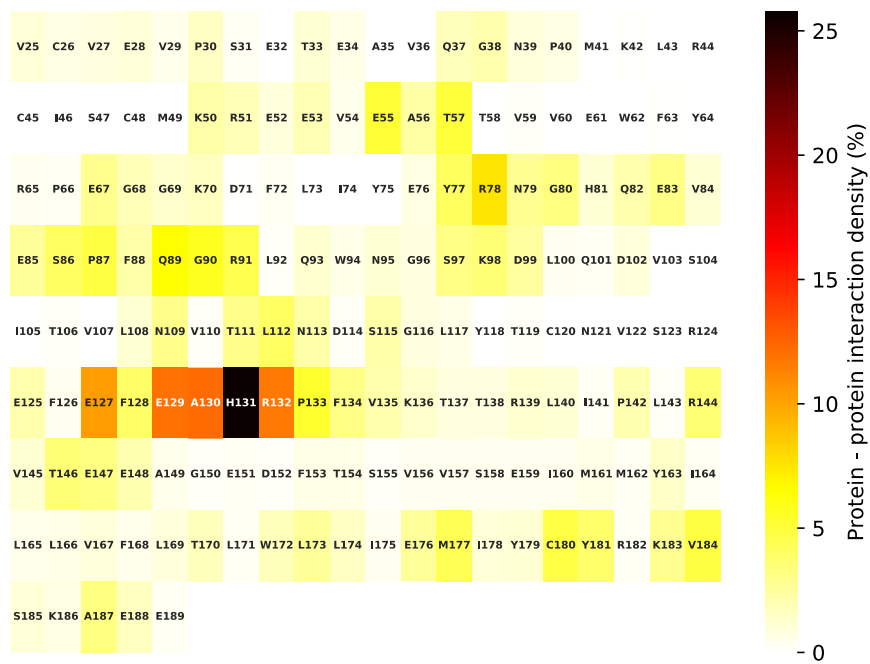

**Figure S5.** Heat map for the protein – protein contacts between copies of the coarse-grained  $\beta 3$  system.

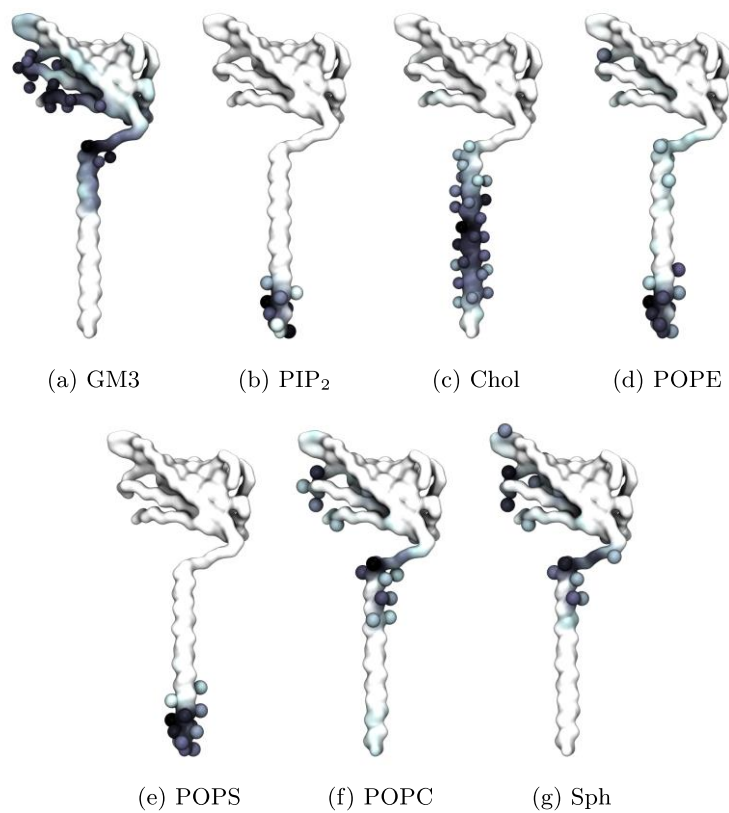

**Figure S6.** Protein-lipid interactions on Face 2 of the coarse-grained  $\beta 3$  subunit.
